# Supplementary material for: National Trends in Cessation Counseling, Prescription Medication Use, and Associated Costs Among US Adult Cigarette Smokers
Source: PubMed Central journal article supplement (PMC6632149; doi:10.1001/jamanetworkopen.2019.4585), 2019-05-24
Supplement: jamanetwopen-2-e194585-s001.pdf [file jamanetwopen-2-e194585-s001.pdf]

## Supplementary Online Content

Tibuakuu M, Okunrintemi V, Jirru E, et al. National trends in cessation counseling, prescription medication use, and associated costs among US adult cigarette smokers. *JAMA Netw Open*. 2019;2(5): e194585. doi:10.1001/jamanetworkopen.2019.4585

**eFigure 1.** Flow Chart of Patient Selection Process, 2006-2015 Medical Expenditure Panel Survey

**eFigure 2.** Trends in Weighted Proportions of US Adult Smokers Reporting Receipt of a Doctor's Advice to Quit, 2006-2015 Medical Expenditure Panel Survey (By Subgroups)

**eTable 1.** ICD-9-CM Codes of Diseases and Self-reported Information

**eTable 2.** Trends in Receipt of a Doctor's Advice to Quit Among US Adult Smokers, 2006-2015 Medical Expenditure Panel Survey

**eTable 3.** Trends in Prescription Cessation Medication Use Among US Adult Smokers, 2006-2015 Medical Expenditure Panel Survey

This supplementary material has been provided by the authors to give readers additional information about their work.

**eFigure 1.** Flow Chart of Patient Selection Process, 2006-2015 Medical Expenditure Panel Survey

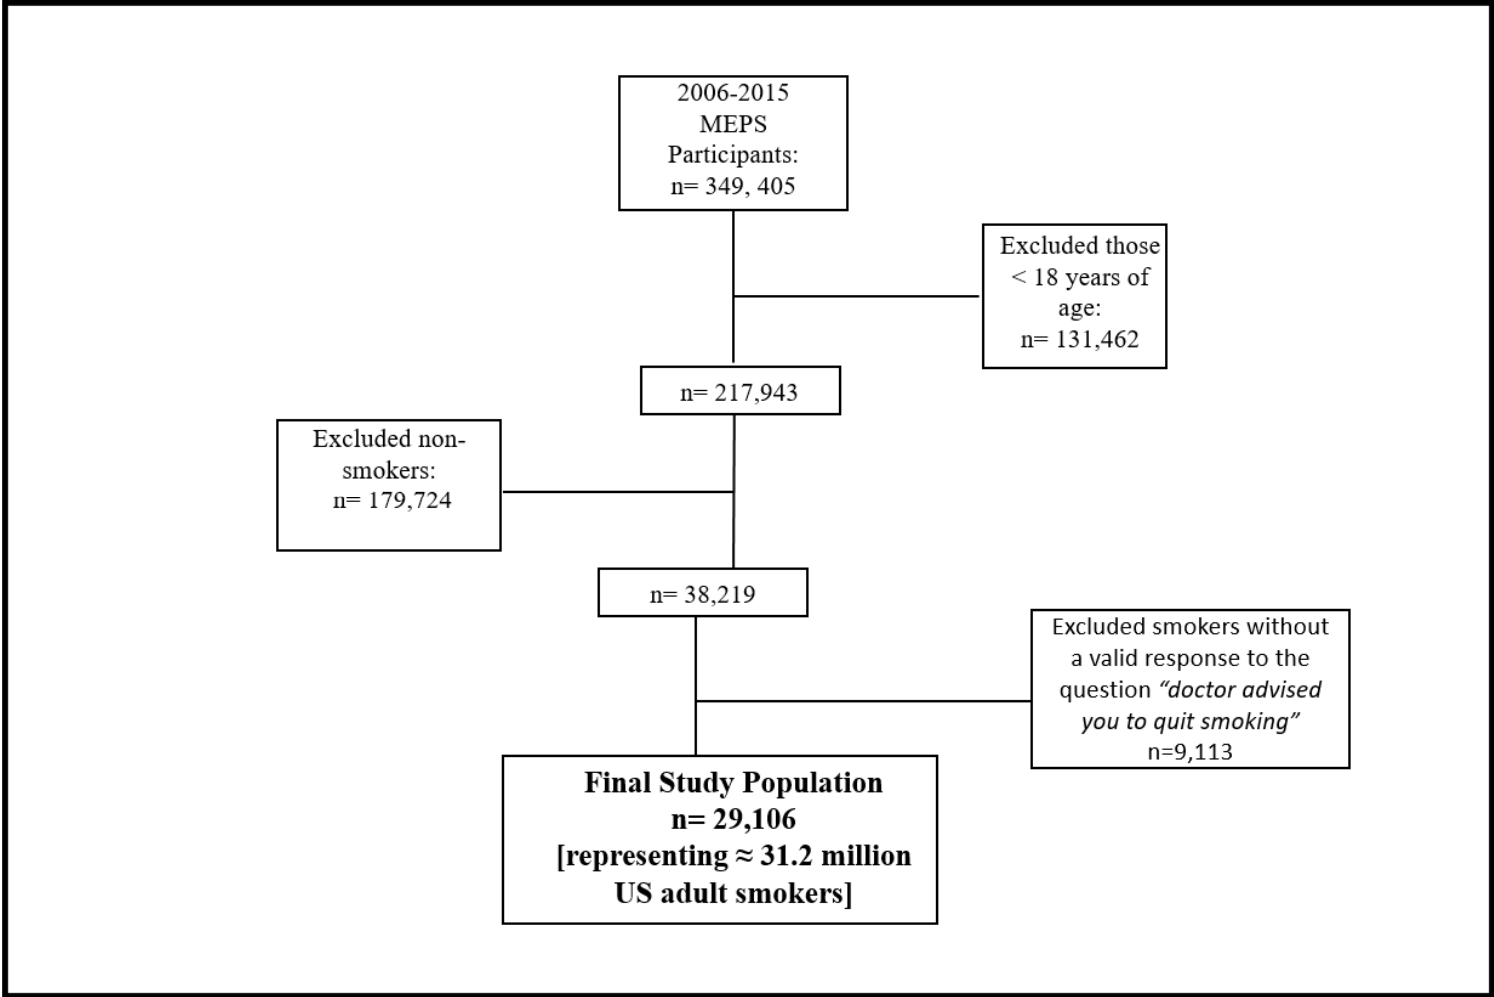

**eFigure 2.** Trends in Weighted Proportions of US Adult Smokers Reporting Receipt of a Doctor's Advice to Quit, 2006-2015 Medical Expenditure Panel Survey (By Subgroups)

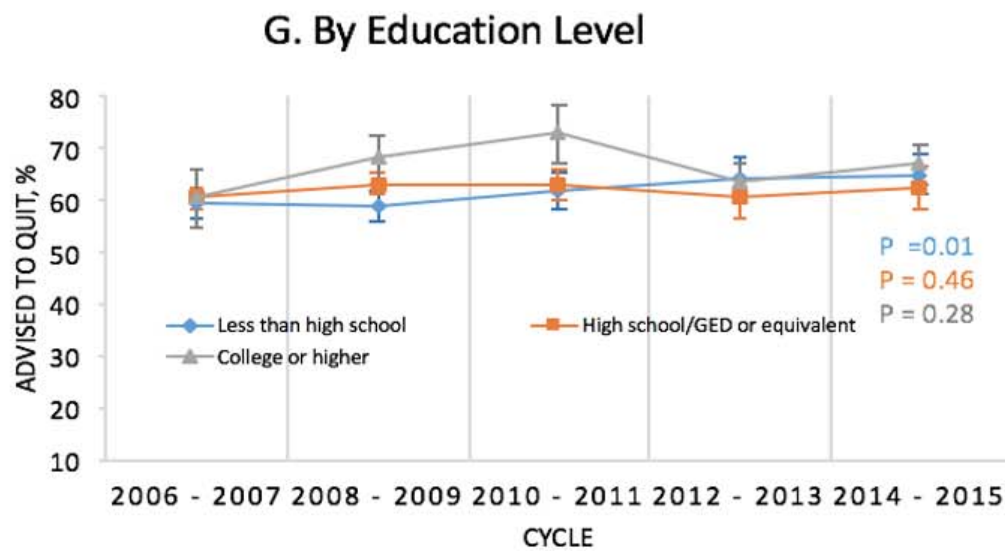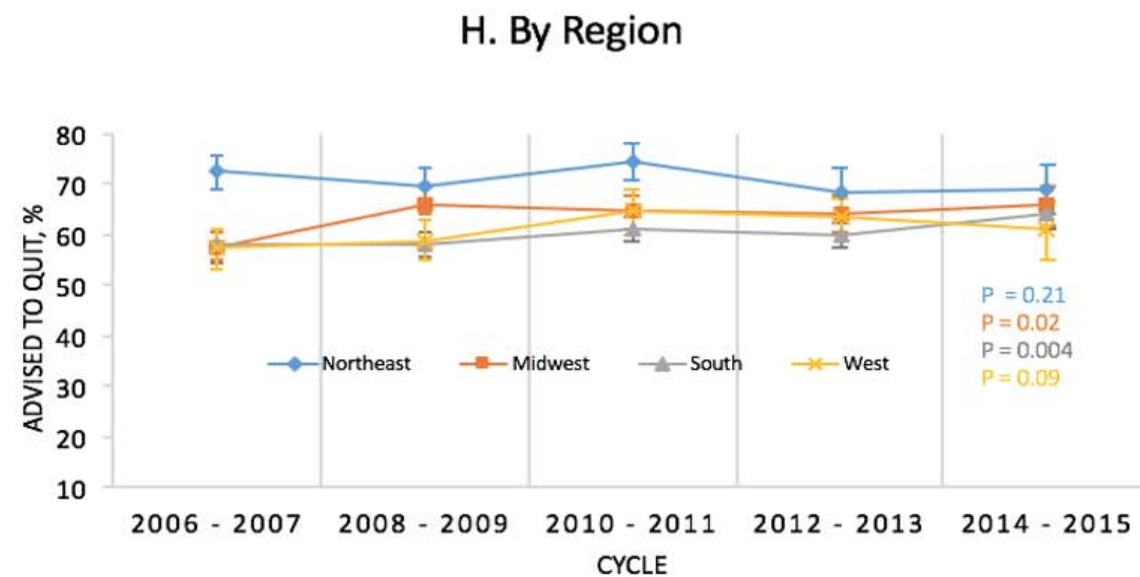

I. By ASCVD Status

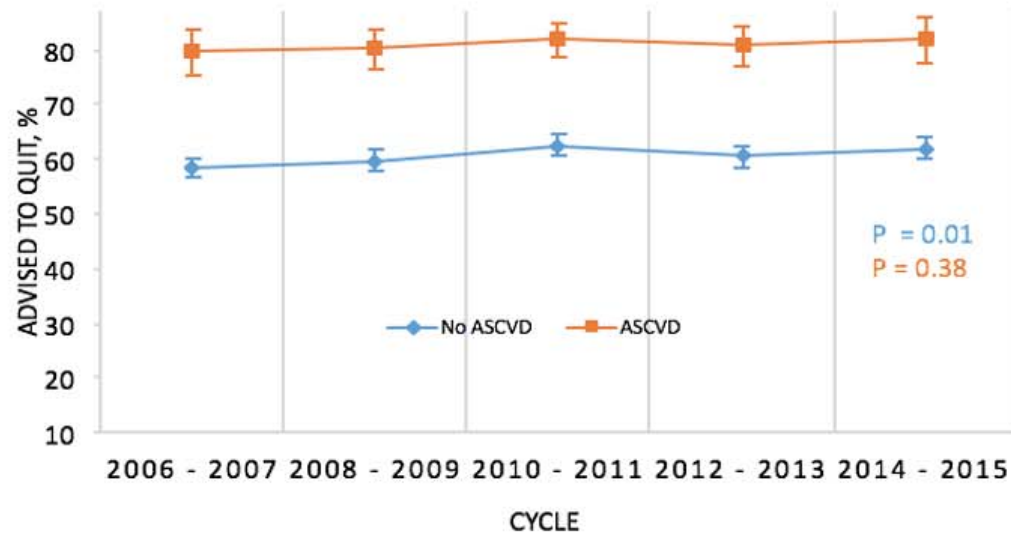

J. By COPD Status

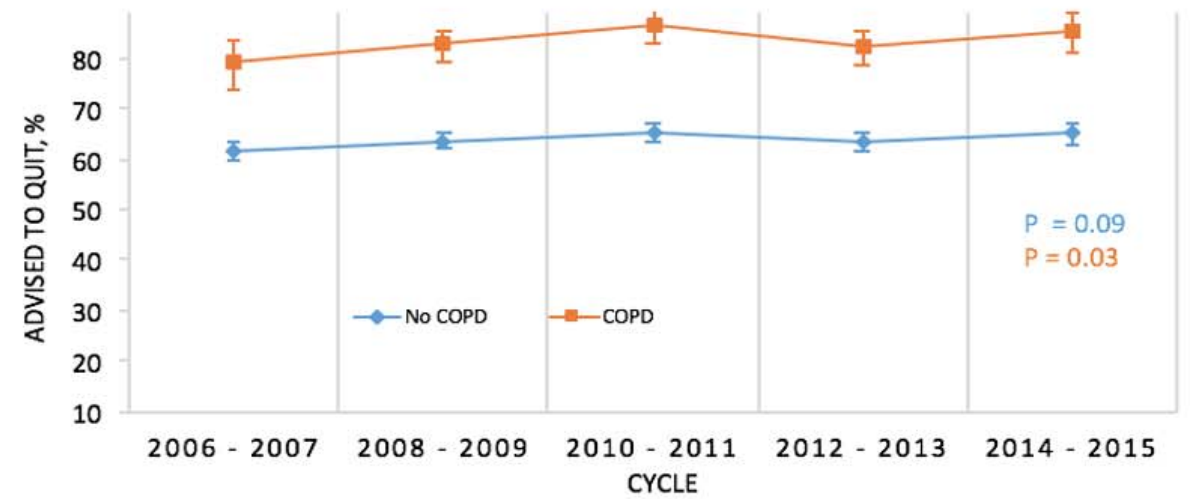

Error bars represent 95% confidence interval; MEPS, Medical Expenditure Panel Survey

**eTable 1.** ICD-9-CM Codes of Diseases and Self-reported Information

| <i>ASCVD and COPD were constructed based on presence of either ICD-9-CM or self-report information</i> |                                                                                                                      |
|--------------------------------------------------------------------------------------------------------|----------------------------------------------------------------------------------------------------------------------|
|                                                                                                        | <b>ASCVD</b>                                                                                                         |
| <i>Condition</i>                                                                                       | <i>ICD-9-CM Code(s)</i>                                                                                              |
| Coronary Artery Disease                                                                                | 410, 413, 414                                                                                                        |
| Stroke                                                                                                 | 433-437                                                                                                              |
| Peripheral Artery Disease                                                                              | 440, 443                                                                                                             |
|                                                                                                        | <i>Self-reported questions for CVD</i>                                                                               |
| Coronary heart disease                                                                                 | Asked if the person had ever been diagnosed as having coronary heart disease                                         |
| Angina                                                                                                 | Asked if the person had ever been diagnosed as having angina, or angina pectoris                                     |
| Myocardial Infarction                                                                                  | Asked if the person had ever been diagnosed as having a heart attack, or myocardial infarction                       |
| Stroke                                                                                                 | Asked if the person had ever been diagnosed as having had a stroke or transient ischemic attack (TIA or ministroke). |
|                                                                                                        | <i>Self-reported questions for cancer</i>                                                                            |
|                                                                                                        | Ascertained by asking whether the person had ever been diagnosed as having cancer or a malignancy of any kind.       |
|                                                                                                        |                                                                                                                      |
|                                                                                                        | <b>COPD</b>                                                                                                          |
| <i>Condition</i>                                                                                       | <i>ICD-9-CM Code(s)</i>                                                                                              |
| Bronchitis, not specified                                                                              | 490                                                                                                                  |
| Chronic bronchitis                                                                                     | 491                                                                                                                  |
| Emphysema                                                                                              | 492                                                                                                                  |
| Bronchiectasis                                                                                         | 494                                                                                                                  |
| Chronic airway obstruction, not elsewhere classified                                                   | 496                                                                                                                  |

ICD-9-CM; International Classification of Diseases, 9th Edition, ASCVD; Atherosclerotic Cardiovascular Disease, COPD; Chronic Obstructive Pulmonary Disease.

| <b>eTable 2.</b> Trends in Receipt of a Doctor's Advice to Quit Among US Adult Smokers, 2006-2015 Medical Expenditure Panel Survey |                    |                    |                    |                    |                    |                   |
|------------------------------------------------------------------------------------------------------------------------------------|--------------------|--------------------|--------------------|--------------------|--------------------|-------------------|
| Cycle                                                                                                                              | % (95% CI)         |                    |                    |                    |                    | p-value for trend |
|                                                                                                                                    | 2006-2007          | 2008-2009          | 2010-2011          | 2012-2013          | 2014-2015          |                   |
| No. of adults                                                                                                                      | 5878               | 6179               | 5847               | 6172               | 5030               |                   |
| Weighted sample, million                                                                                                           | 6.4                | 6.7                | 6.3                | 6.2                | 5.6                |                   |
| <b>Overall</b>                                                                                                                     |                    |                    |                    |                    |                    |                   |
|                                                                                                                                    | 60.2 (58.5–62.0)   | 62.5 (60.8–64.2)   | 65.0 (63.2–66.6)   | 63.1 (61.5–64.8)   | 64.9 (62.8–66.9)   | 0.001             |
| <b>Age, category, y</b>                                                                                                            |                    |                    |                    |                    |                    |                   |
| 18-39                                                                                                                              | 51.1 (48.2 – 53.9) | 53.5 (50.7 – 56.2) | 55.2 (52.1 – 58.2) | 53.8 (51.0 – 56.6) | 55.7 (52.5 – 58.8) | 0.05              |
| 40-64                                                                                                                              | 65.9 (63.7 – 68.0) | 68.1 (65.7 – 70.4) | 70.0 (67.8 – 72.2) | 67.3 (64.7 – 69.8) | 68.8 (66.2 – 71.4) | 0.24              |
| 65-74                                                                                                                              | 71.2 (65.7 – 76.1) | 73.1 (66.6 – 78.8) | 81.0 (76.2 – 85.0) | 78.2 (72.9 – 82.8) | 78.2 (72.2 – 83.2) | 0.05              |
| ≥ 75                                                                                                                               | 64.6 (55.0 – 72.2) | 59.5 (49.6 – 68.7) | 69.4 (61.9 – 76.1) | 72.1 (61.2 – 80.8) | 75.1 (64.1 – 83.6) | 0.04              |
| <b>Sex</b>                                                                                                                         |                    |                    |                    |                    |                    |                   |
| Men                                                                                                                                | 56.1 (53.8 – 58.3) | 58.1 (55.7 – 60.4) | 60.7 (58.3 – 63.0) | 59.1 (56.9 – 61.3) | 60.0 (57.3 – 62.6) | 0.02              |
| Women                                                                                                                              | 65.0 (62.8 – 67.2) | 67.5 (65.3 – 69.6) | 69.8 (67.4 – 72.1) | 67.7 (65.2 – 70.1) | 70.3 (67.6 – 72.8) | 0.01              |
| <b>Race/ethnicity</b>                                                                                                              |                    |                    |                    |                    |                    |                   |
| Non-Hispanic white                                                                                                                 | 61.0 (58.9 – 63.0) | 64.8 (62.7 – 66.8) | 66.2 (64.1 – 68.3) | 64.9 (62.7 – 67.0) | 66.6 (64.1 – 69.1) | 0.003             |
| Non-Hispanic black                                                                                                                 | 61.4 (57.3 – 65.4) | 56.3 (52.6 – 60.0) | 62.1 (59.2 – 65.0) | 60.9 (57.7 – 64.0) | 59.7 (56.1 – 63.1) | 0.82              |
| Asian                                                                                                                              | 68.4 (56.7 – 78.2) | 59.5 (48.2 – 69.8) | 66.7 (57.7 – 74.5) | 57.1 (50.0 – 64.4) | 67.7 (56.5 – 77.2) | 0.86              |
| Hispanic                                                                                                                           | 50.0 (44.7 – 55.2) | 49.9 (45.6 – 54.3) | 57.9 (53.2 – 62.5) | 55.2 (50.6 – 59.7) | 57.9 (53.5 – 62.2) | 0.01              |
| <b>Education</b>                                                                                                                   |                    |                    |                    |                    |                    |                   |
| < High school                                                                                                                      | 59.5 (56.5 – 62.4) | 59.0 (56.2 – 61.7) | 61.8 (58.2 – 65.4) | 64.1 (59.7 – 68.4) | 65.0 (61.0 – 68.7) | 0.01              |
| High school/GED Equivalent                                                                                                         | 60.6 (58.5 – 62.7) | 63.2 (61.1 – 65.2) | 63.2 (60.1 – 66.2) | 60.6 (56.8 – 64.3) | 62.6 (58.6 – 66.4) | 0.46              |
| > some college                                                                                                                     | 60.4 (54.8 – 65.8) | 68.1 (63.2 – 72.7) | 73.0 (67.2 – 78.2) | 63.6 (60.0 – 67.0) | 67.3 (63.3 – 71.0) | 0.28              |
| <b>Health insurance status</b>                                                                                                     |                    |                    |                    |                    |                    |                   |
| Private                                                                                                                            | 61.3 (59.0 – 63.6) | 66.0 (63.6 – 68.3) | 67.2 (64.8 – 69.6) | 64.4 (61.9 – 66.8) | 65.5 (62.4 – 68.5) | 0.09              |

|                            |                    |                    |                    |                    |                    |        |
|----------------------------|--------------------|--------------------|--------------------|--------------------|--------------------|--------|
| Public (Medicare/Medicaid) | 68.3 (65.1 – 71.4) | 67.7 (64.4 – 70.9) | 72.2 (69.6 – 74.6) | 73.6 (70.7 – 76.3) | 70.0 (66.9 – 72.9) | 0.13   |
| Uninsured                  | 46.3 (42.7 – 49.8) | 44.1 (40.7 – 47.6) | 48.6 (45.0 – 52.2) | 43.4 (39.6 – 47.4) | 45.4 (40.3 – 50.7) | 0.71   |
| Family income level        |                    |                    |                    |                    |                    |        |
| High income                | 63.4 (59.9 – 66.8) | 67.6 (64.4 – 70.7) | 71.0 (67.9 – 73.9) | 66.7 (63.0 – 70.3) | 67.6 (63.1 – 71.9) | 0.15   |
| Middle income              | 59.1 (56.3 – 61.8) | 62.7 (60.0 – 65.4) | 66.0 (62.8 – 69.1) | 60.6 (57.9 – 63.3) | 63.0 (59.2 – 66.1) | 0.27   |
| Low income                 | 55.7 (51.5 – 59.8) | 56.1 (52.4 – 59.8) | 59.5 (55.7 – 63.1) | 62.4 (57.8 – 66.8) | 65.0 (60.6 – 69.2) | <0.001 |
| Poor                       | 60.3 (56.9 – 63.6) | 60.2 (57.7 – 62.6) | 61.2 (58.4 – 63.9) | 63.1 (60.5 – 65.5) | 64.6 (61.1 – 68.0) | 0.03   |
| Census Region              |                    |                    |                    |                    |                    |        |
| Northeast                  | 72.7 (69.2 – 75.9) | 69.7 (65.6 – 73.5) | 74.6 (70.7 – 78.1) | 68.6 (63.8 – 73.1) | 69.1 (64.2 – 73.6) | 0.21   |
| Midwest                    | 57.7 (54.9 – 60.5) | 66.1 (62.4 – 69.5) | 64.5 (61.0 – 67.8) | 64.0 (60.2 – 67.6) | 65.7 (61.7 – 69.5) | 0.02   |
| South                      | 57.8 (54.5 – 61.0) | 58.2 (55.9 – 60.4) | 61.3 (58.7 – 63.8) | 60.0 (57.7 – 62.2) | 63.9 (61.1 – 66.5) | 0.004  |
| West                       | 57.5 (53.4 – 61.4) | 58.9 (54.9 – 62.7) | 64.7 (60.1 – 69.0) | 63.7 (59.7 – 67.4) | 61.2 (55.3 – 66.7) | 0.09   |
| Comorbid condition         |                    |                    |                    |                    |                    |        |
| No ASCVD                   | 58.3 (56.6 – 60.1) | 59.8 (57.9 – 61.6) | 62.6 (60.7 – 64.5) | 60.5 (58.7 – 62.3) | 62.0 (59.9 – 64.1) | 0.01   |
| ASCVD                      | 79.9 (75.5 – 83.8) | 80.2 (76.2 – 83.7) | 82.1 (78.7 – 85.1) | 81.0 (77.1 – 84.3) | 82.3 (77.8 – 86.1) | 0.38   |
| No COPD                    | 61.7 (59.7 – 63.6) | 63.3 (62.4 – 65.3) | 65.2 (63.2 – 67.1) | 63.6 (61.7 – 65.4) | 65.2 (63.1 – 67.3) | 0.03   |
| COPD                       | 79.1 (74.0 – 83.4) | 82.7 (79.0 – 85.6) | 86.8 (83.1 – 89.8) | 82.3 (78.7 – 85.4) | 85.5 (81.3 – 88.8) | 0.09   |

Abbreviations: MEPS, Medical Expenditure Panel Survey; SD, standard deviation; ASCVD, Atherosclerotic Cardiovascular Disease; COPD, Chronic Obstructive Pulmonary Disease.

| <b>eTable 3. Trends in Prescription Cessation Medication Use Among US Adult Smokers, 2006-2015 Medical Expenditure Panel</b> |                  |                  |                 |                 |                  |                   |
|------------------------------------------------------------------------------------------------------------------------------|------------------|------------------|-----------------|-----------------|------------------|-------------------|
| Cycle                                                                                                                        | % (95% CI)       |                  |                 |                 |                  | p-value for trend |
|                                                                                                                              | 2006-2007        | 2008-2009        | 2010-2011       | 2012-2013       | 2014-2015        |                   |
| No. of adults                                                                                                                | 5878             | 6179             | 5847            | 6172            | 5030             |                   |
| Weighted sample, millions                                                                                                    | 6.4              | 6.7              | 6.3             | 6.2             | 5.6              |                   |
| <b>Overall</b>                                                                                                               |                  |                  |                 |                 |                  |                   |
|                                                                                                                              | 6.0 (5.2–6.9)    | 5.3 (4.5–6.1)    | 4.9 (4.1–5.7)   | 4.6 (4.0–5.3)   | 5.5 (4.6–6.5)    | 0.22              |
| <b>Age, category, y</b>                                                                                                      |                  |                  |                 |                 |                  |                   |
| 18-39                                                                                                                        | 4.3 (3.1 – 5.8)  | 3.7 (2.8 – 4.9)  | 4.3 (3.1 – 5.9) | 3.6 (2.4 – 5.3) | 4.8 (3.6 – 6.7)  | 0.62              |
| 40-64                                                                                                                        | 7.7 (6.5 – 9.0)  | 6.3 (5.2 – 7.8)  | 5.3 (4.2 – 6.7) | 5.5 (4.6 – 6.7) | 6.2 (4.9 – 7.8)  | 0.06              |
| 65-74                                                                                                                        | 4.1 (2.2 – 7.5)  | 5.8 (3.0 – 11.0) | 6.1 (4.2 – 8.7) | 4.2 (2.4 – 7.3) | 5.1 (2.8 – 9.3)  | 0.98              |
| ≥ 75                                                                                                                         | 2.6 (0.7 – 9.3)  | 2.4 (0.7 – 7.7)  | 2.0 (0.7 – 5.8) | 1.8 (0.3 – 9.9) | 3.1 (0.9 – 10.7) | 0.96              |
| <b>Sex</b>                                                                                                                   |                  |                  |                 |                 |                  |                   |
| Men                                                                                                                          | 4.8 (3.9 – 6.0)  | 4.9 (3.8 – 6.3)  | 3.8 (2.9 – 5.1) | 4.6 (3.6 – 5.8) | 5.0 (3.9 – 6.4)  | 0.97              |
| Women                                                                                                                        | 7.1 (5.9 – 8.6)  | 5.6 (4.6 – 6.8)  | 5.9 (5.0 – 7.0) | 4.6 (3.7 – 5.7) | 6.0 (4.8 – 7.5)  | 0.13              |
| <b>Race/ethnicity</b>                                                                                                        |                  |                  |                 |                 |                  |                   |
| Non-Hispanic white                                                                                                           | 7.0 (5.9 – 8.2)  | 6.1 (5.1 – 7.3)  | 5.3 (4.4 – 6.4) | 5.0 (4.2 – 6.0) | 6.1 (5.0 – 7.5)  | 0.11              |
| Non-Hispanic black                                                                                                           | 3.1 (2.1 – 4.5)  | 2.8 (1.8 – 4.4)  | 3.4 (2.4 – 4.7) | 2.8 (1.8 – 4.4) | 3.0 (2.1 – 4.4)  | 0.93              |
| Asian                                                                                                                        | 4.0 (1.1 – 13.3) | ***              | ***             | 2.5 (0.7 – 7.8) | ***              | 0.18              |
| Hispanic                                                                                                                     | 1.7 (0.9 – 3.3)  | 2.5 (1.3 – 4.7)  | 3.6 (2.1 – 6.0) | 4.5 (2.3 – 8.8) | 4.0 (2.4 – 6.4)  | 0.02              |
| <b>Education</b>                                                                                                             |                  |                  |                 |                 |                  |                   |
| < High school                                                                                                                | 5.2 (3.9 – 6.9)  | 4.0 (2.8 – 5.7)  | 4.6 (3.0 – 7.1) | 5.1 (3.4 – 7.7) | 4.4 (2.8 – 6.7)  | 0.75              |
| High school/GED Equivalent                                                                                                   | 5.8 (4.8 – 6.9)  | 5.6 (4.5 – 6.8)  | 4.5 (3.2 – 6.3) | 3.7 (2.4 – 5.6) | 5.2 (3.4 – 7.8)  | 0.20              |



|                               |                   |                  |                  |                  |                  |      |
|-------------------------------|-------------------|------------------|------------------|------------------|------------------|------|
| > some college                | 9.0 (6.5 – 12.3)  | 6.8 (4.4 – 10.3) | 8.7 (5.4 – 13.9) | 5.1 (3.6 – 7.1)  | 5.6 (4.0 – 7.6)  | 0.02 |
| Health insurance status       |                   |                  |                  |                  |                  |      |
| Private                       | 6.6 (5.5 – 8.1)   | 5.9 (4.7 – 7.4)  | 5.3 (4.1 – 6.8)  | 5.2 (4.2 – 6.4)  | 6.0 (4.8 – 7.6)  | 0.30 |
| Public<br>(Medicare/Medicaid) | 5.6 (4.2 – 7.3)   | 5.6 (4.1 – 7.5)  | 5.6 (4.4 – 7.1)  | 4.7 (3.8 – 5.9)  | 5.6 (4.2 – 7.3)  | 0.80 |
| Uninsured                     | 4.7 (2.9 – 7.6)   | 2.4 (1.6 – 3.4)  | 1.3 (0.7 – 2.4)  | 2.5 (1.4 – 4.4)  | 2.5 (1.1 – 5.2)  | 0.08 |
| Family income level           |                   |                  |                  |                  |                  |      |
| High income                   | 7.1 (5.6 – 9.0)   | 6.6 (5.1 – 8.5)  | 5.4 (3.8 – 7.5)  | 4.7 (3.3 – 6.8)  | 5.2 (3.5 – 7.6)  | 0.03 |
| Middle income                 | 5.1 (3.9 – 6.7)   | 5.8 (4.6 – 7.2)  | 4.2 (3.1 – 5.6)  | 5.8 (4.4 – 7.6)  | 6.4 (4.7 – 8.7)  | 0.38 |
| Low income                    | 6.9 (5.0 – 9.6)   | 3.8 (2.6 – 5.5)  | 3.6 (2.2 – 6.0)  | 3.5 (2.3 – 5.4)  | 4.2 (2.9 – 5.9)  | 0.05 |
| Poor                          | 5.0 (3.8 – 6.6)   | 3.9 (3.0 – 5.2)  | 6.0 (4.7 – 7.6)  | 3.9 (3.0 – 5.1)  | 5.6 (4.1 – 7.6)  | 0.67 |
| Census Region                 |                   |                  |                  |                  |                  |      |
| Northeast                     | 6.1 (4.1 – 9.0)   | 5.6 (3.6 – 8.7)  | 5.6 (3.8 – 8.4)  | 5.0 (3.7 – 6.7)  | 5.5 (3.4 – 8.7)  | 0.63 |
| Midwest                       | 7.1 (5.6 – 8.9)   | 5.9 (4.3 – 8.1)  | 4.6 (3.5 – 6.2)  | 5.4 (4.1 – 7.0)  | 7.2 (5.5 – 9.5)  | 0.82 |
| South                         | 5.7 (4.5 – 7.3)   | 3.5 (2.7 – 4.7)  | 4.5 (3.4 – 5.9)  | 4.2 (3.2 – 5.4)  | 4.9 (3.7 – 6.5)  | 0.60 |
| West                          | 4.7 (3.2 – 7.0)   | 7.6 (5.8 – 10.0) | 5.6 (3.8 – 8.2)  | 3.8 (2.4 – 6.0)  | 4.1 (2.5 – 6.5)  | 0.17 |
| Comorbid condition            |                   |                  |                  |                  |                  |      |
| No ASCVD                      | 5.6 (4.7 – 6.6)   | 4.8 (4.0 – 5.7)  | 4.9 (4.0 – 5.8)  | 4.1 (3.5 – 5.0)  | 5.3 (4.5 – 6.3)  | 0.35 |
| ASCVD                         | 9.3 (6.6 – 12.9)  | 7.6 (5.6 – 10.2) | 5.0 (3.6 – 7.1)  | 7.1 (4.8 – 10.4) | 6.4 (4.3 – 9.5)  | 0.20 |
| No COPD                       | 5.5 (4.6 – 6.5)   | 4.6 (3.9 – 5.5)  | 4.4 (3.4 – 5.3)  | 4.1 (3.4 – 4.9)  | 5.0 (4.1 – 5.9)  | 0.51 |
| COPD                          | 10.3 (7.6 – 13.9) | 8.2 (6.0 – 11.3) | 8.1 (5.8 – 11.2) | 7.6 (5.4 – 10.7) | 8.6 (6.0 – 12.4) | 0.25 |

Abbreviations: MEPS, Medical Expenditure Panel Survey; SD, standard deviation; ASCVD, Atherosclerotic Cardiovascular Disease; COPD, Chronic Obstructive Pulmonary Disease.
